# Supplementary material for: Transcutaneous electrical acupuncture stimulation as a countermeasure against cardiovascular deconditioning during 4 days of head-down bed rest in humans
Source: PubMed Central journal article supplement — Acupunct Med. 2015 May 29;33(5):381–7. doi: 10.1136/acupmed-2014-010730 (PMC4680135; doi:10.1136/acupmed-2014-010730), 2015-05-29

Supplementary Figures

Supplementary Figure 1. Locations of PC-6 points for TEAS.

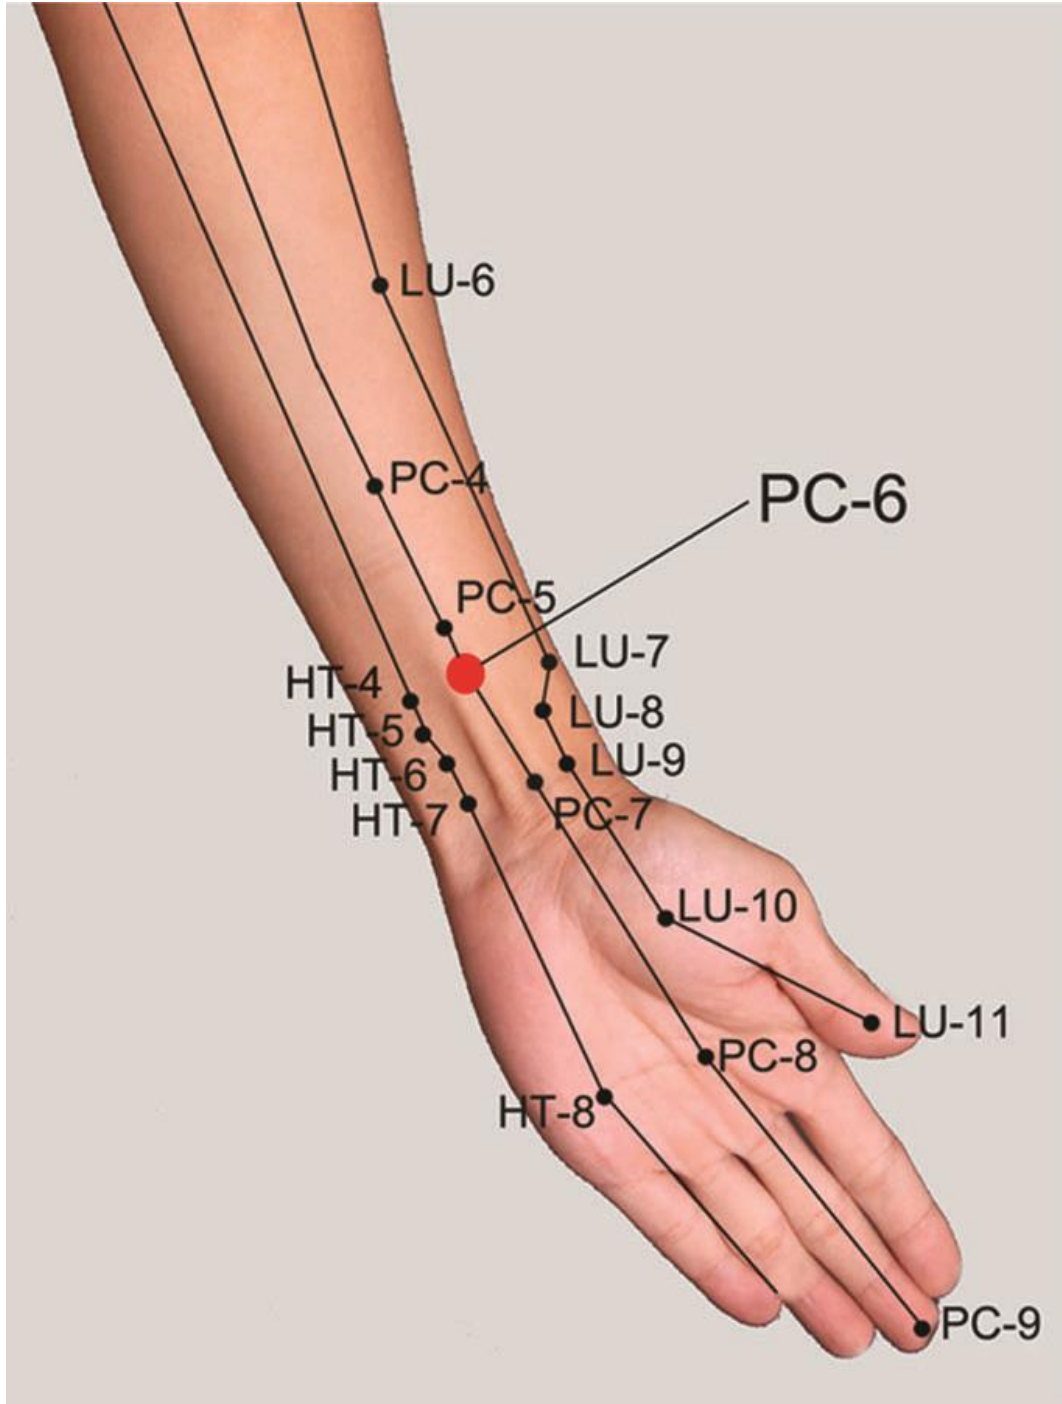

**Supplementary Figure 2.** Changes in cerebral blood flow in the middle cerebral artery during a 4-day head-down bed rest (HDBR) in both control (Con) and Transcutaneous electrical acupuncture stimulation (TEAS) groups. **(A)** Changes in CBFV<sub>sys</sub> before, during, and after a 4-day HDBR in both Con and TEAS groups. **(B)** Changes in CBFV<sub>dia</sub> before, during, and after a 4-day HDBR in both Con and TEAS groups. **(C)** Changes in RI before, during, and after a 4-day HDBR in both Con and TEAS groups. **(D)** Changes in PI before, during, and after a 4-day HDBR in both Con and TEAS groups. A decreased CBFV<sub>sys</sub> and CBFV<sub>dia</sub> were observed in the Con group during HDBR, while there were no significant changes in these indices in the TEAS group. CBFV<sub>sys</sub>: cerebral blood flow velocity systolic; CBFV<sub>dia</sub>: cerebral blood flow velocity diastolic; PI: pulsatility index; RI: resistance index. \* $P < 0.05$  compared with pre-HDBR.

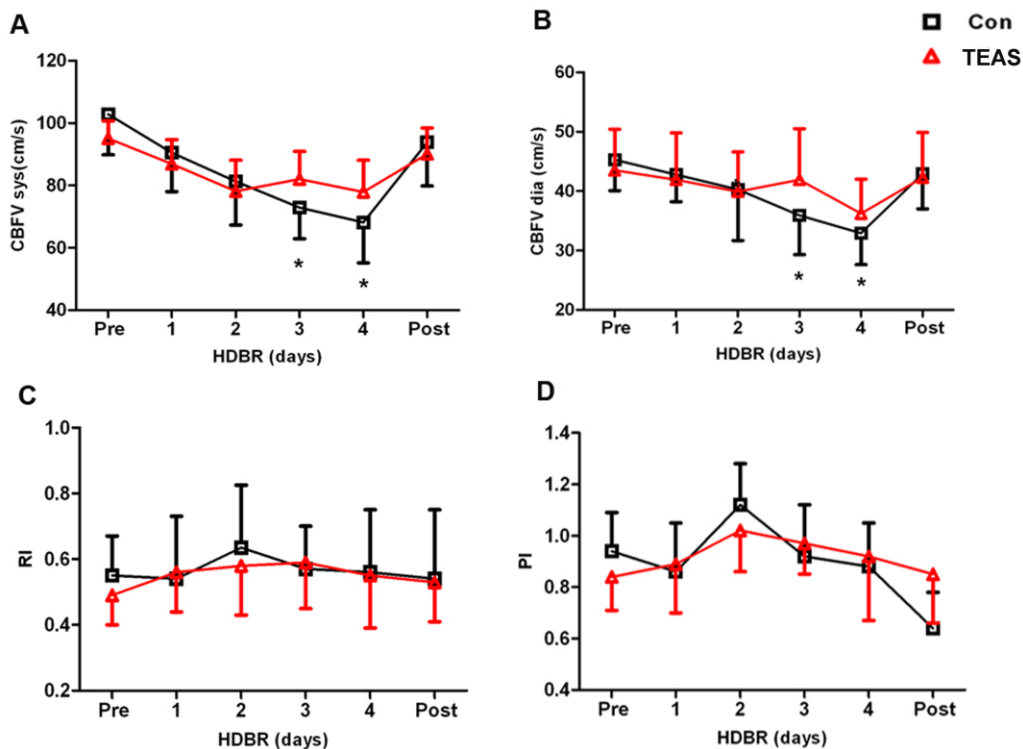

Supplement: acupmed-2014-010730-s1.pdf [file acupmed-2014-010730-s1.pdf]
