# Supplementary material for: Transcutaneous electrical acupuncture stimulation as a countermeasure against cardiovascular deconditioning during 4 days of head-down bed rest in humans
Source: PubMed Central journal article supplement — Acupunct Med. 2015 May 29;33(5):381–7. doi: 10.1136/acupmed-2014-010730 (PMC4680135; doi:10.1136/acupmed-2014-010730), 2015-05-29
Supplement: acupmed-2014-010730-s2.pdf [file acupmed-2014-010730-s2.pdf]

**Supplementary table:** Weight, HR and arterial blood pressure before, during and after 4-day HDBR in both Con and TEAS groups.

|             | Group   | Pre-HDBR | HDBR-1 | HDBR-2 | HDBR-3 | HDBR-4 | Post-HDBR |
|-------------|---------|----------|--------|--------|--------|--------|-----------|
| Weight (Kg) | Control | 68±9     | 68±5   | 67±8   | 66±5   | 67±5   | 68±6      |
|             | TEAS    | 65±6     | 65±7   | 64±5   | 64±6   | 65±4   | 65±3      |
| HR (bpm)    | Control | 68±8     | 69±5   | 71±4   | 73±8   | 74±9   | 77±5      |
|             | TEAS    | 67±5     | 67±7   | 70±8   | 73±8   | 75±8   | 78±8      |
| SBP (mmHg)  | Control | 115±9    | 118±8  | 123±5  | 120±7  | 118±5  | 125±8     |
|             | TEAS    | 116±7    | 117±7  | 115±9  | 122±6  | 116±7  | 123±4     |
| DBP (mmHg)  | Control | 75±8     | 76±4   | 78±5   | 80±5   | 79±6   | 80±7      |
|             | TEAS    | 74±8     | 75±9   | 76±5   | 78±8   | 76±5   | 82±7      |

HR: heart rate, SBP: arterial blood pressure, DBP: diastolic arterial blood pressure, Control group, without any countermeasure, TEAS group: received a daily 30 min of TEAS treatment
